# Supplementary material
Source: ML conference proceedings conference paper supplement (https://openaccess.thecvf.com/content/ICCV2025/html/Zeng_GaussianUpdate_Continual_3D_ICCV_2025_paper.html)
Supplement: Supplementary file 1 [file 07565_supp.pdf › 07565_supp/07565_supp.pdf]

# GaussianUpdate: Continual 3D Gaussian Splatting Update for Changing Environments Supplementary Material

Lin Zeng\*    Boming Zhao\*    Jiarui Hu    Xujie Shen  
Ziqiang Dang    Hujun Bao    Zhaopeng Cui<sup>†</sup>  
State Key Lab of CAD & CG, Zhejiang University

In this supplementary material, we provide additional details about the GaussianUpdate framework, including: (1) a detailed explanation of the Appearance Model (Sec. A); (2) the Sky Ball (Sec. B); (3) additional experimental results (Sec. C) on the Synthetic NeRF dataset (Sec. D) and the WAT dataset (Sec. E); and (4) additional experiments (Sec. F). We also discuss how our method requires fewer Gaussian points compared to training a 3D Gaussian model at each time step (Sec. G). Additionally, a video supplement is provided to summarize our method and showcase the results.

## A. Further Details on the Appearance Model

Our appearance model consists of a 4D hash grid and a tiny MLP. The 4D hash grid consists of  $L=16$  layers of hash tables, each layer containing  $T=2^{21}$  features of dimension  $F=4$ , with a coarsest grid resolution of 16. The tiny MLP consists of two layers, each with 128 neurons. The appearance model takes position  $xyz \in \mathbb{R}^3$  and timestamp  $t \in \mathbb{R}^1$  as inputs and outputs features of 51 dimensions, comprising the spherical harmonics coefficients  $\in \mathbb{R}^{48}$  and scaling  $\in \mathbb{R}^3$ .

## B. Sky Ball

The WAT dataset contains numerous unbounded sky areas across scene communities, spa, and streets. Since SFM or MVS does not initialize points in sky regions, directly using these initialization points for training can result in sub-optimal outcomes. To address this, we introduce a "sky ball" during the training of the initial 3D Gaussian Splatting model with  $T_0$  in these scenes. Specifically, we first determine the center and radius of the MVS initial point cloud. We then uniformly distribute 100,000 points within a 3D sphere, with a radius ten times that of the initial point cloud, as the initialized Gaussian. This approach significantly

enhances the performance of 3D Gaussian Splatting in unbounded scenes with extensive sky regions.

| Method     | WAT                |                    | Synthetic NeRF     |                    |
|------------|--------------------|--------------------|--------------------|--------------------|
|            | PSNR( $\uparrow$ ) | SSIM( $\uparrow$ ) | PSNR( $\uparrow$ ) | SSIM( $\uparrow$ ) |
| NT         | 16.89              | 0.631              | 22.27              | 0.812              |
| CLNeRF [1] | 25.45              | 0.764              | 32.16              | 0.957              |
| 4DGS [4]   | 25.70              | 0.816              | 32.18              | 0.959              |
| Ours       | 26.31              | 0.83               | 33.44              | 0.967              |
| UB         | 26.47              | 0.83               | 33.87              | 0.969              |

Table 1. **Quantitative comparison**. Best results are highlighted as **first**, **second**.

## C. Further Quantitative Results

Table 1 presents the average PSNR and SSIM results of various methods across different datasets. It is evident that our method achieves higher PSNR and SSIM values compared to CLNeRF, and its performance is very close to the upper bound of our approach.

| Method        | Kitchen | Breville | Car   | Average |
|---------------|---------|----------|-------|---------|
| 3DGStream [3] | 26.40   | 24.90    | 20.05 | 23.78   |
| Ours          | 28.02   | 30.11    | 23.81 | 27.31   |

Table 2. **Comparison of the average PSNR between our method and 3DGS across the Kitchen, Breville, and Car scenes in the WAT dataset**. Best results are highlighted as **first**, **second**.

## D. Additional Qualitative Results for the Synthetic NeRF Dataset

We further show the quantitative results of different methods on the Synthetic NeRF dataset in Figure 1.

\*Equal contribution.

<sup>†</sup>Corresponding author.

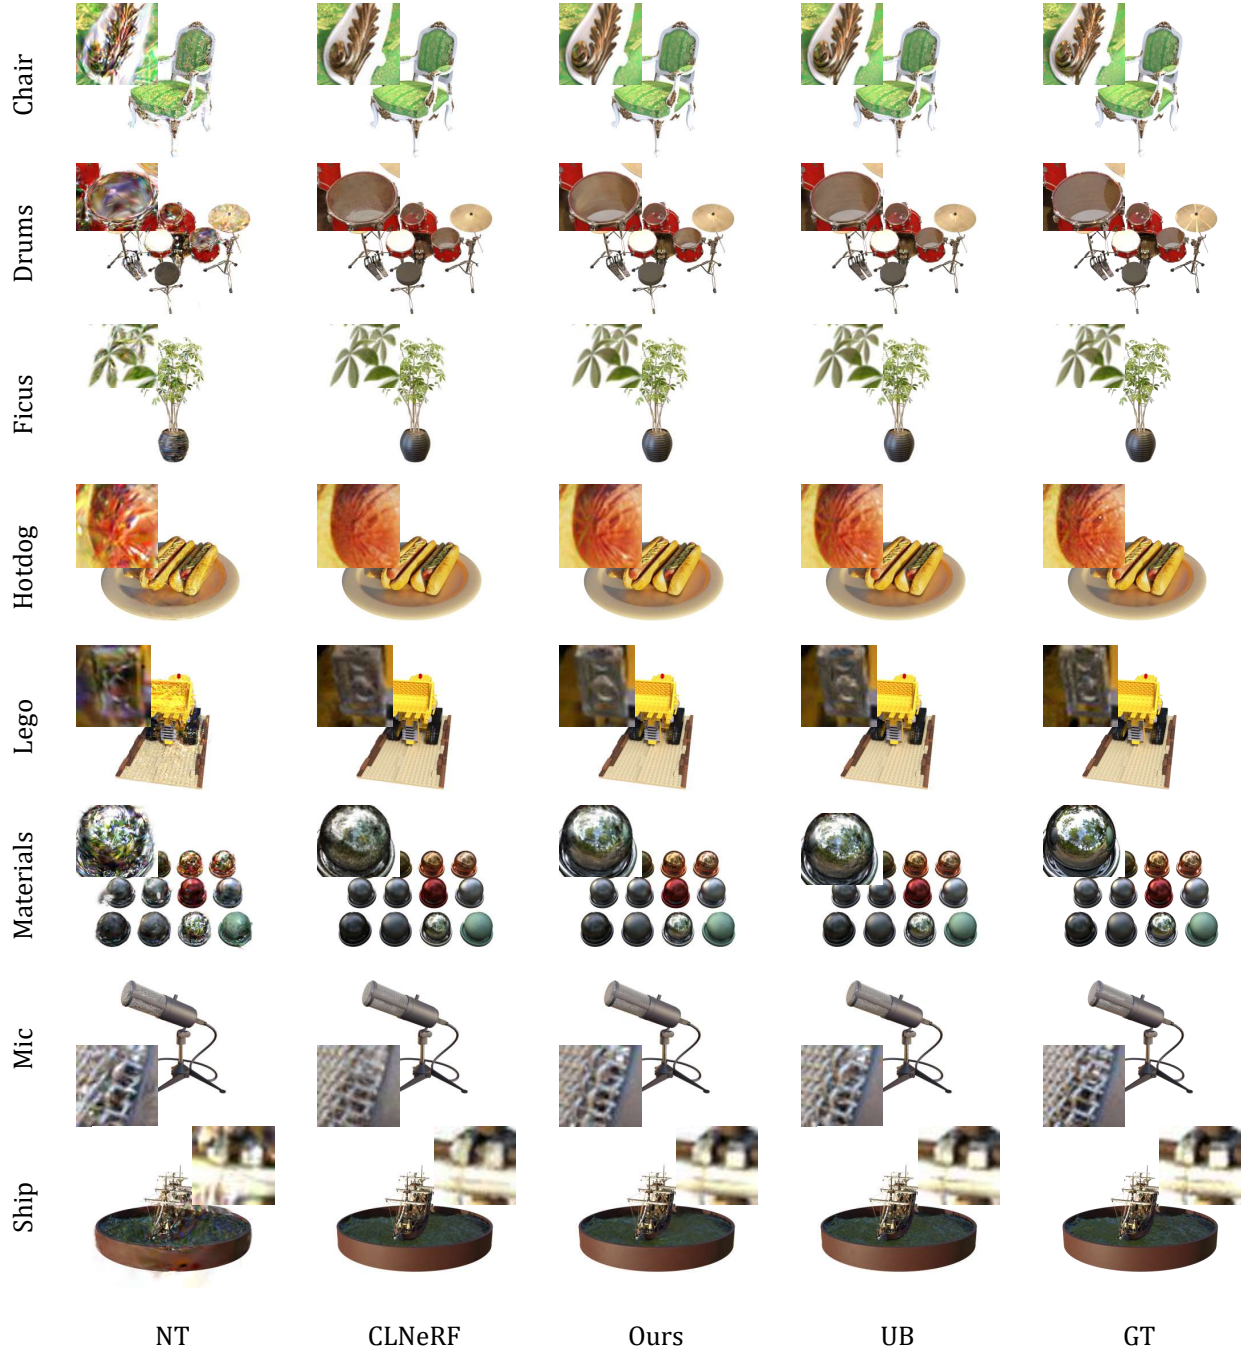

Figure 1. Visualizaton results on Synthetic NeRF dataset.

### E. Quantitative Results of Our Method for Individual Scenes in the WAT Dataset

Table 5 and Table 6 present the PSNR of our method at each moment in all scenarios of the WAT dataset. Since the SSIM does not change significantly after each model update (for example, the SSIM measured on the test dataset at the

first moment with the model updated at the first moment is almost identical to the SSIM measured on the test dataset at the first moment with the model updated at the last moment), we only show the SSIM results at the last moment.

| Method     | Playground         |                    | Truck              |                    |
|------------|--------------------|--------------------|--------------------|--------------------|
|            | PSNR( $\uparrow$ ) | SSIM( $\uparrow$ ) | PSNR( $\uparrow$ ) | SSIM( $\uparrow$ ) |
| Baseline   | 12.59              | 0.416              | 12.75              | 0.479              |
| CLNeRF [1] | 22.37              | 0.643              | 22.61              | 0.695              |
| Ours       | 22.93              | 0.744              | 22.44              | 0.770              |
| UB         | 23.34              | 0.771              | 23.38              | 0.804              |

Table 3. **Quantitative comparison on Tanks&Temples dataset.** Best results are highlighted as **first** , **second** .

## F. Additional Experiment

We further compared our method with 3DGStream [3] on the WAT [1] dataset. Although the training process of 3DGStream is similar to ours, it requires a Neural Transformation Cache (NTC) to be saved for every moment, leading to increased memory consumption. Moreover, as shown in Table 2 and Figure 2, 3DGStream struggles to handle dynamic scenes with significant changes between consecutive moments, making it less suitable for such scenarios.

We also selected several scenes from Tanks&Temples [2] dataset for our experiments, with the results presented in Table 3. The datasets were utilized in a manner similar to Synthetic NeRF and were divided into 10 sequences for training.

In addition, we also tested the effect of setting different training iterations at different training stages. We kept the total training iterations for the three training stages at 30k, and changed the training steps in the first and second stages. As shown in the table 4, varying iteration counts yields no significant performance differences. These demonstrate that our method is robust to stage iteration settings.

| 1st stage \ 2nd stage | 7K Iters | 8K Iters | 9K Iters |
|-----------------------|----------|----------|----------|
|                       | 6K Iters | 7K Iters | 8K Iters |
| 6K Iters              | 30.19    | 30.16    | 30.10    |
| 7K Iters              | 30.17    | 30.11    | 30.08    |
| 8K Iters              | 30.16    | 30.15    | 30.13    |

Table 4. Effect of different iterations settings PSNR results on WAT Breville scene.

## G. Memory

Compared to training a separate 3D Gaussian model for each moment, our method requires only a single model to encapsulate information from multiple scenes. On the WAT dataset, our method uses an average of 870,000 Gaussian points to model each scene, whereas retraining a 3D Gaussian model at each time step would require an average of 1.5 million Gaussian points. This represents an average reduction of 42% in the number of Gaussian points needed.

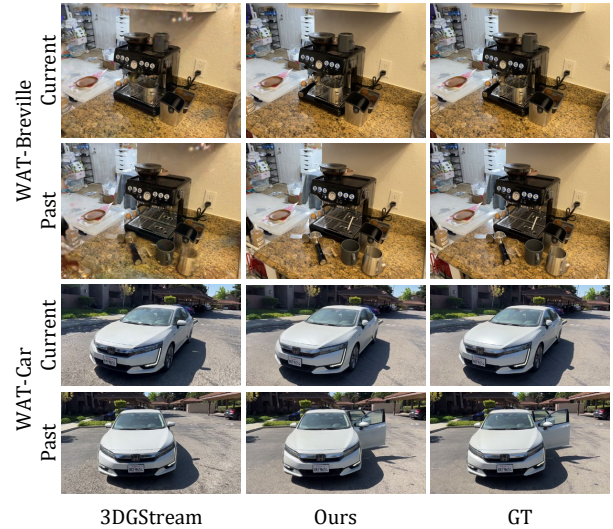

Figure 2. **Visualizaton results on WAT dataset with 3DGStream.**

| Moment         | Community       |                |                |                |                |                |                |                |                |                | SSIM $\uparrow$ |
|----------------|-----------------|----------------|----------------|----------------|----------------|----------------|----------------|----------------|----------------|----------------|-----------------|
|                | PSNR $\uparrow$ |                |                |                |                |                |                |                |                |                |                 |
|                | T <sub>0</sub>  | T <sub>1</sub> | T <sub>2</sub> | T <sub>3</sub> | T <sub>4</sub> | T <sub>5</sub> | T <sub>6</sub> | T <sub>7</sub> | T <sub>8</sub> | T <sub>9</sub> |                 |
| T <sub>0</sub> | 25.43           | -              | -              | -              | -              | -              | -              | -              | -              | -              | 0.837           |
| T <sub>1</sub> | 25.43           | 23.01          | -              | -              | -              | -              | -              | -              | -              | -              | 0.707           |
| T <sub>2</sub> | 25.43           | 23.05          | 24.39          | -              | -              | -              | -              | -              | -              | -              | 0.809           |
| T <sub>3</sub> | 25.43           | 23.05          | 24.37          | 26.76          | -              | -              | -              | -              | -              | -              | 0.839           |
| T <sub>4</sub> | 25.43           | 23.03          | 24.28          | 26.70          | 24.80          | -              | -              | -              | -              | -              | 0.822           |
| T <sub>5</sub> | 25.43           | 22.98          | 24.24          | 26.55          | 24.90          | 24.62          | -              | -              | -              | -              | 0.809           |
| T <sub>6</sub> | 25.43           | 22.99          | 24.12          | 26.44          | 24.87          | 24.63          | 23.44          | -              | -              | -              | 0.779           |
| T <sub>7</sub> | 25.43           | 22.96          | 24.08          | 26.38          | 24.79          | 24.57          | 23.30          | 25.16          | -              | -              | 0.831           |
| T <sub>8</sub> | 25.43           | 22.96          | 24.05          | 26.31          | 24.71          | 24.52          | 23.17          | 24.95          | 22.65          | -              | 0.697           |
| T <sub>9</sub> | 25.43           | 22.98          | 24.02          | 26.22          | 24.65          | 24.46          | 23.17          | 24.92          | 22.56          | 20.25          | 0.531           |

Table 5. The results of Community scene at each moment.

| Moment         | Breville        |                |                |                |                |                 | Kitchen         |                |                |                |                |                 |
|----------------|-----------------|----------------|----------------|----------------|----------------|-----------------|-----------------|----------------|----------------|----------------|----------------|-----------------|
|                | PSNR $\uparrow$ |                |                |                |                | SSIM $\uparrow$ | PSNR $\uparrow$ |                |                |                |                | SSIM $\uparrow$ |
|                | T <sub>0</sub>  | T <sub>1</sub> | T <sub>2</sub> | T <sub>3</sub> | T <sub>4</sub> |                 | T <sub>0</sub>  | T <sub>1</sub> | T <sub>2</sub> | T <sub>3</sub> | T <sub>4</sub> |                 |
| T <sub>0</sub> | 29.93           | -              | -              | -              | -              | 0.933           | 28.94           | -              | -              | -              | -              | 0.920           |
| T <sub>1</sub> | 29.93           | 32.12          | -              | -              | -              | 0.948           | 28.94           | 28.28          | -              | -              | -              | 0.909           |
| T <sub>2</sub> | 29.93           | 32.07          | 28.41          | -              | -              | 0.907           | 28.94           | 28.29          | 28.71          | -              | -              | 0.909           |
| T <sub>3</sub> | 29.93           | 32.03          | 28.28          | 29.29          | -              | 0.916           | 28.94           | 28.23          | 28.64          | 28.62          | -              | 0.925           |
| T <sub>4</sub> | 29.93           | 32.05          | 28.04          | 29.15          | 30.67          | 0.928           | 28.94           | 28.24          | 28.66          | 28.65          | 26.22          | 0.904           |
| =              |                 |                |                |                |                |                 |                 |                |                |                |                |                 |
| Moment         | Living room     |                |                |                |                |                 | Ninja           |                |                |                |                |                 |
|                | PSNR $\uparrow$ |                |                |                |                | SSIM $\uparrow$ | PSNR $\uparrow$ |                |                |                |                | SSIM $\uparrow$ |
|                | T <sub>0</sub>  | T <sub>1</sub> | T <sub>2</sub> | T <sub>3</sub> | T <sub>4</sub> |                 | T <sub>0</sub>  | T <sub>1</sub> | T <sub>2</sub> | T <sub>3</sub> | T <sub>4</sub> |                 |
| T <sub>0</sub> | 25.13           | -              | -              | -              | -              | 0.879           | 28.86           | -              | -              | -              | -              | 0.943           |
| T <sub>1</sub> | 25.13           | 25.90          | -              | -              | -              | 0.883           | 28.86           | 29.20          | -              | -              | -              | 0.927           |
| T <sub>2</sub> | 25.13           | 25.88          | 25.91          | -              | -              | 0.866           | 28.86           | 29.20          | 27.36          | -              | -              | 0.917           |
| T <sub>3</sub> | 25.13           | 25.83          | 25.84          | 27.03          | -              | 0.905           | 28.86           | 29.20          | 27.41          | 27.78          | -              | 0.929           |
| T <sub>4</sub> | 25.13           | 25.70          | 25.78          | 26.98          | 26.82          | 0.876           | 28.86           | 29.14          | 27.36          | 27.66          | 26.07          | 0.895           |
|                |                 |                |                |                |                |                 |                 |                |                |                |                |                 |
| Moment         | Spa             |                |                |                |                |                 | Street          |                |                |                |                |                 |
|                | PSNR $\uparrow$ |                |                |                |                | SSIM $\uparrow$ | PSNR $\uparrow$ |                |                |                |                | SSIM $\uparrow$ |
|                | T <sub>0</sub>  | T <sub>1</sub> | T <sub>2</sub> | T <sub>3</sub> | T <sub>4</sub> |                 | T <sub>0</sub>  | T <sub>1</sub> | T <sub>2</sub> | T <sub>3</sub> | T <sub>4</sub> |                 |
| T <sub>0</sub> | 28.89           | -              | -              | -              | -              | 0.911           | 26.20           | -              | -              | -              | -              | 0.862           |
| T <sub>1</sub> | 28.89           | 27.78          | -              | -              | -              | 0.887           | 26.20           | 24.20          | -              | -              | -              | 0.771           |
| T <sub>2</sub> | 28.89           | 27.75          | 27.11          | -              | -              | 0.887           | 26.20           | 24.21          | 21.44          | -              | -              | 0.659           |
| T <sub>3</sub> | 28.89           | 27.67          | 27.09          | 27.23          | -              | 0.869           | 26.20           | 24.20          | 21.41          | 21.83          | -              | 0.668           |
| T <sub>4</sub> | 28.89           | 27.74          | 27.11          | 27.03          | 28.36          | 0.911           | 26.20           | 24.20          | 21.40          | 21.83          | 21.17          | 0.602           |
|                |                 |                |                |                |                |                 |                 |                |                |                |                |                 |
| Moment         | Car             |                |                |                |                |                 | Grill           |                |                |                |                |                 |
|                | PSNR $\uparrow$ |                |                |                |                | SSIM $\uparrow$ | PSNR $\uparrow$ |                |                |                |                | SSIM $\uparrow$ |
|                | T <sub>0</sub>  | T <sub>1</sub> | T <sub>2</sub> | T <sub>3</sub> | T <sub>4</sub> |                 | T <sub>0</sub>  | T <sub>1</sub> | T <sub>2</sub> | T <sub>3</sub> | T <sub>4</sub> |                 |
| T <sub>0</sub> | 23.66           | -              | -              | -              | -              | 0.750           | 27.23           | -              | -              | -              | -              | 0.825           |
| T <sub>1</sub> | 23.66           | 23.46          | -              | -              | -              | 0.721           | 27.23           | 25.12          | -              | -              | -              | 0.769           |
| T <sub>2</sub> | 23.66           | 23.45          | 23.49          | -              | -              | 0.738           | 27.23           | 25.12          | 24.70          | -              | -              | 0.765           |
| T <sub>3</sub> | 23.66           | 23.42          | 23.44          | 24.03          | -              | 0.747           | 27.23           | 25.10          | 24.65          | 25.25          | -              | 0.758           |
| T <sub>4</sub> | 23.66           | 23.40          | 23.38          | 23.97          | 24.59          | 0.757           | 27.23           | 25.08          | 24.61          | 25.19          | 24.66          | 0.741           |
|                |                 |                |                |                |                |                 |                 |                |                |                |                |                 |
| Moment         | Mac             |                |                |                |                |                 |                 |                |                |                |                |                 |
|                | PSNR $\uparrow$ |                |                |                |                |                 | SSIM $\uparrow$ |                |                |                |                |                 |
|                | T <sub>0</sub>  | T <sub>1</sub> | T <sub>2</sub> | T <sub>3</sub> | T <sub>4</sub> | T <sub>5</sub>  |                 |                |                |                |                |                 |
| T <sub>0</sub> | 32.77           | -              | -              | -              | -              | -               | 0.956           |                |                |                |                |                 |
| T <sub>1</sub> | 32.77           | 30.13          | -              | -              | -              | -               | 0.943           |                |                |                |                |                 |
| T <sub>2</sub> | 32.77           | 30.08          | 29.07          | -              | -              | -               | 0.922           |                |                |                |                |                 |
| T <sub>3</sub> | 32.77           | 29.92          | 28.86          | 29.07          | -              | -               | 0.930           |                |                |                |                |                 |
| T <sub>4</sub> | 32.77           | 29.88          | 28.66          | 28.94          | 30.90          | -               | 0.936           |                |                |                |                |                 |
| T <sub>5</sub> | 32.77           | 29.80          | 28.67          | 28.91          | 30.81          | 29.64           | 0.928           |                |                |                |                |                 |

Table 6. The results of each scene at each moment.

## References

- [1] Zhipeng Cai and Matthias Müller. Clnrf: Continual learning meets nerf. In *Proceedings of the IEEE/CVF International Conference on Computer Vision*, pages 23185–23194, 2023. [1](#), [3](#)
- [2] Arno Knapitsch, Jaesik Park, Qian-Yi Zhou, and Vladlen Koltun. Tanks and temples: benchmarking large-scale scene reconstruction. *ACM Trans. Graph.*, 36(4):78:1–78:13, 2017. [3](#)
- [3] Jiakai Sun, Han Jiao, Guangyuan Li, Zhanjie Zhang, Lei Zhao, and Wei Xing. 3dstream: On-the-fly training of 3d gaussians for efficient streaming of photo-realistic free-viewpoint videos. *arXiv preprint arXiv:2403.01444*, 2024. [1](#), [3](#)
- [4] Guanjun Wu, Taoran Yi, Jiemin Fang, Lingxi Xie, Xiaopeng Zhang, Wei Wei, Wenyu Liu, Qi Tian, and Xinggang Wang. 4d gaussian splatting for real-time dynamic scene rendering. In *Proceedings of the IEEE/CVF Conference on Computer Vision and Pattern Recognition*, pages 20310–20320, 2024. [1](#)
